# Supplementary material
Source: publisher figshare collection journal article supplement (https://sage.figshare.com/ndownloader/files/24233732)

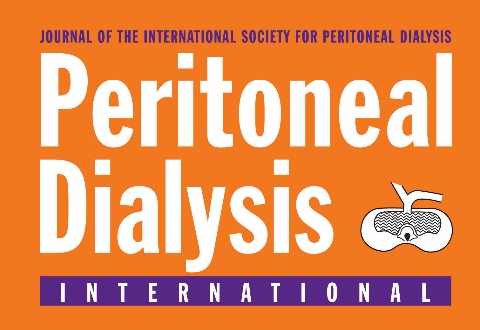


**Supplemental Materials for**

**Assessment of hydration status changes by bioimpedance spectroscopy in children on peritoneal dialysis**

Vasiliki Karava1, Stella Stabouli1, John Dotis1, Vassilios Liakopoulos2, Fotios Papachristou1, Nikoleta Printza1

Supplemental Material File Listing

3 Figures

Vasiliki Karava

1st Department of Pediatrics, Aristotle University of Thessaloniki, Hippokratio General Hospital, 49

Konstantinoupoleos Street, 54642, Thessaloniki, Greece

e-mail: vasilikikarava@hotmail.fr

tel: +306976674306

**Supplementary Figure 1**

Distribution of bioimpedance spectroscopy (BIS) parameters including : (A) extracellular to total body water ratio (ECW/TBW), (B) extracellular to intracellular ratio body water ratio (E/I) and (C) difference between actual body weight (ABW) and body weight estimated by BIS (BW [BIS]) according to BIS-based hydration status


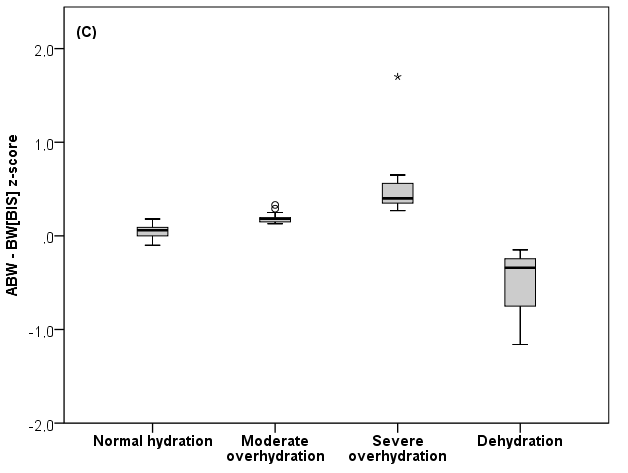

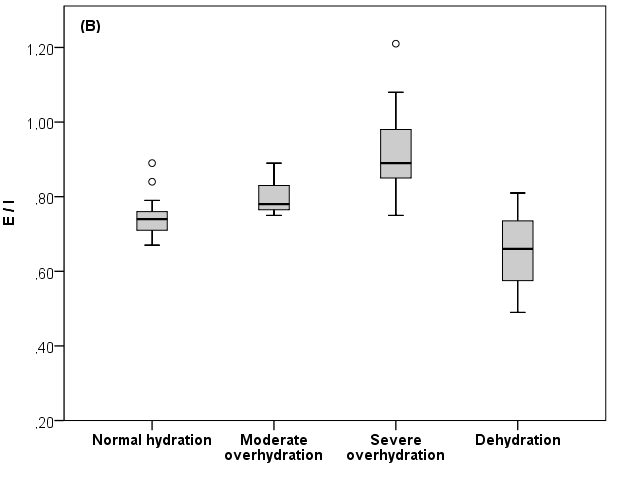

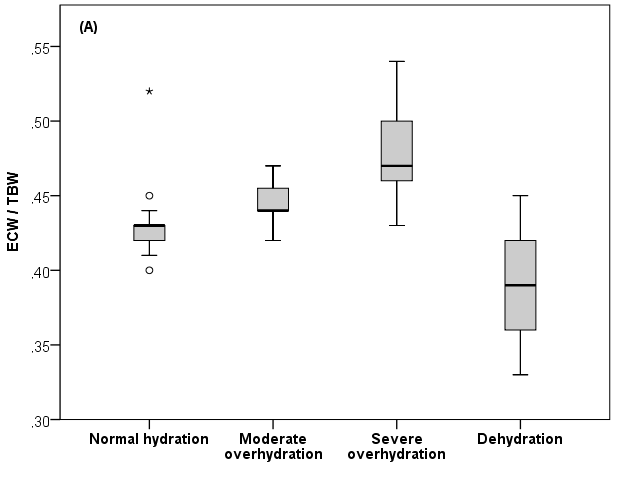


**Supplementary Figure 2**

Scatter plot analysis of the visit-to-visit changes in relative overhydration (Re-OH), assessed by bioimpedance spectroscopy (BIS), and the changes in systolic blood pressure (SBP) z-score colored according to the number of Re-OH changes per patient


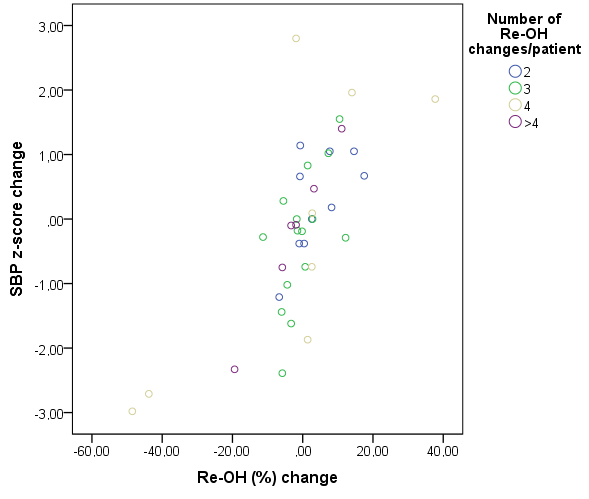


**Supplementary Figure 3**

Scatter plot analysis of the visit-to-visit changes in relative overhydration (Re-OH), assessed by bioimpedance spectroscopy (BIS), and the changes in systolic blood pressure (SBP) z-score after a two-step cluster analysis


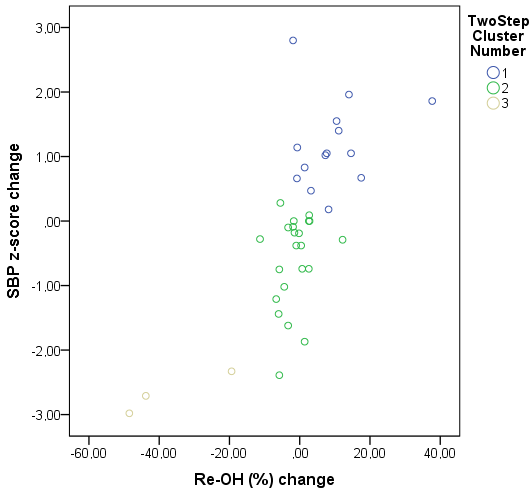

Supplement: Supplementary file 1 [file 24233732]
